# Supplementary material for: Bergenin protects against osteoarthritis by inhibiting STAT3, NF-κB and Jun pathways and suppressing osteoclastogenesis
Source: PubMed Central journal article supplement — Sci Rep. 2024 Aug 31;14:20292. doi: 10.1038/s41598-024-71259-9 (PMC11366014; doi:10.1038/s41598-024-71259-9), 2024-08-31
Supplement: 41598_2024_71259_MOESM4_ESM.pdf [file 41598_2024_71259_MOESM4_ESM.pdf]

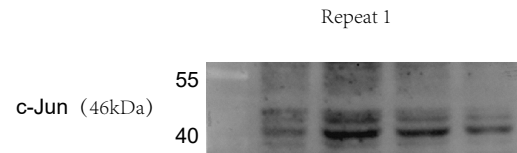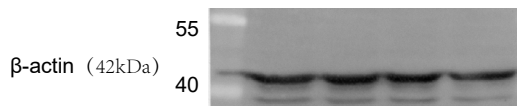

|                               |   |   |            |            |
|-------------------------------|---|---|------------|------------|
| <b>il-1<math>\beta</math></b> | - | + | +          | +          |
| <b>Bergenin</b>               | - | - | 10 $\mu$ M | 20 $\mu$ M |

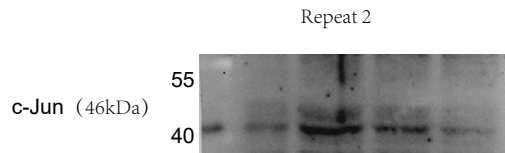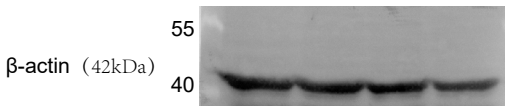

|                               |   |   |            |            |
|-------------------------------|---|---|------------|------------|
| <b>il-1<math>\beta</math></b> | - | + | +          | +          |
| <b>Bergenin</b>               | - | - | 10 $\mu$ M | 20 $\mu$ M |

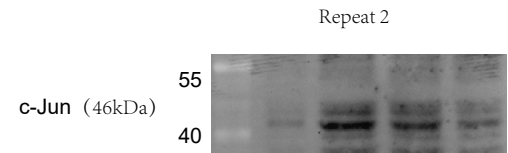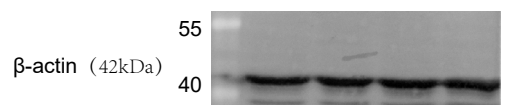

|                               |   |   |            |            |
|-------------------------------|---|---|------------|------------|
| <b>il-1<math>\beta</math></b> | - | + | +          | +          |
| <b>Bergenin</b>               | - | - | 10 $\mu$ M | 20 $\mu$ M |
