# Supplementary material for: Bergenin protects against osteoarthritis by inhibiting STAT3, NF-κB and Jun pathways and suppressing osteoclastogenesis
Source: PubMed Central journal article supplement — Sci Rep. 2024 Aug 31;14:20292. doi: 10.1038/s41598-024-71259-9 (PMC11366014; doi:10.1038/s41598-024-71259-9), 2024-08-31
Supplement: 41598_2024_71259_MOESM6_ESM.pdf [file 41598_2024_71259_MOESM6_ESM.pdf]

Repeat 1

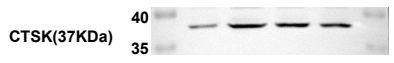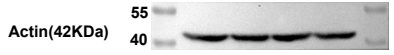

|             |   |   |      |      |
|-------------|---|---|------|------|
| RANKL+M-CSF | - | + | +    | +    |
| Bergenin    | - | - | 10µM | 20µM |

Repeat 2

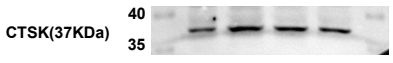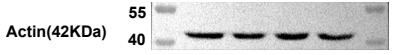

|             |   |   |      |      |
|-------------|---|---|------|------|
| RANKL+M-CSF | - | + | +    | +    |
| Bergenin    | - | - | 10µM | 20µM |

Repeat 3

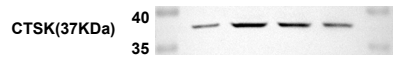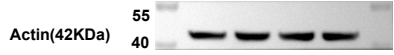

|             |   |   |      |      |
|-------------|---|---|------|------|
| RANKL+M-CSF | - | + | +    | +    |
| Bergenin    | - | - | 10µM | 20µM |
