# Supplementary figures and images for: Bergenin protects against osteoarthritis by inhibiting STAT3, NF-κB and Jun pathways and suppressing osteoclastogenesis
Source: PubMed Central journal article supplement — Sci Rep. 2024 Aug 31;14:20292. doi: 10.1038/s41598-024-71259-9 (PMC11366014; doi:10.1038/s41598-024-71259-9), 2024-08-31

Repeat 1

Repeat 2

Repeat 3

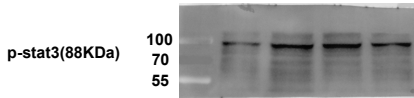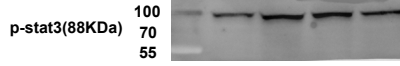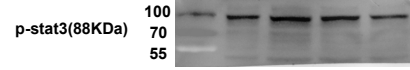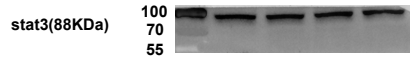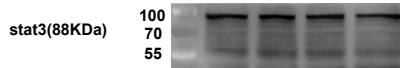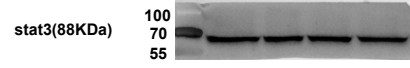

|              |   |   |            |            |
|--------------|---|---|------------|------------|
| IL-1 $\beta$ | - | + | +          | +          |
| Bergenin     | - | - | 10 $\mu$ M | 20 $\mu$ M |

|              |   |   |            |            |
|--------------|---|---|------------|------------|
| IL-1 $\beta$ | - | + | +          | +          |
| Bergenin     | - | - | 10 $\mu$ M | 20 $\mu$ M |

|              |   |   |            |            |
|--------------|---|---|------------|------------|
| IL-1 $\beta$ | - | + | +          | +          |
| Bergenin     | - | - | 10 $\mu$ M | 20 $\mu$ M |

Supplement: 41598_2024_71259_MOESM10_ESM.pdf [file 41598_2024_71259_MOESM10_ESM.pdf]

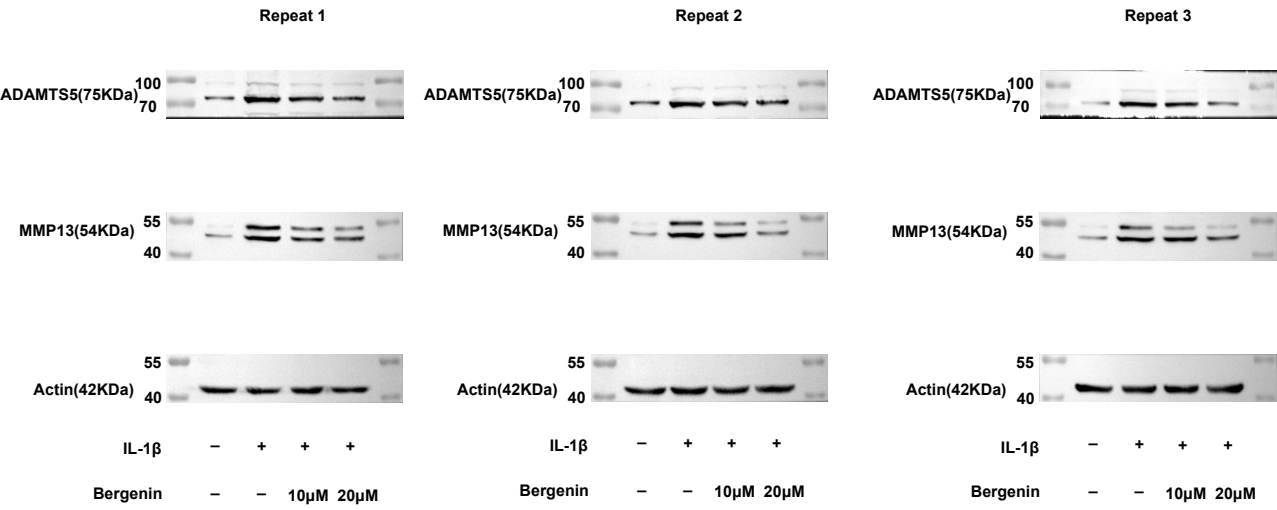

Supplement: 41598_2024_71259_MOESM1_ESM.pdf [file 41598_2024_71259_MOESM1_ESM.pdf]

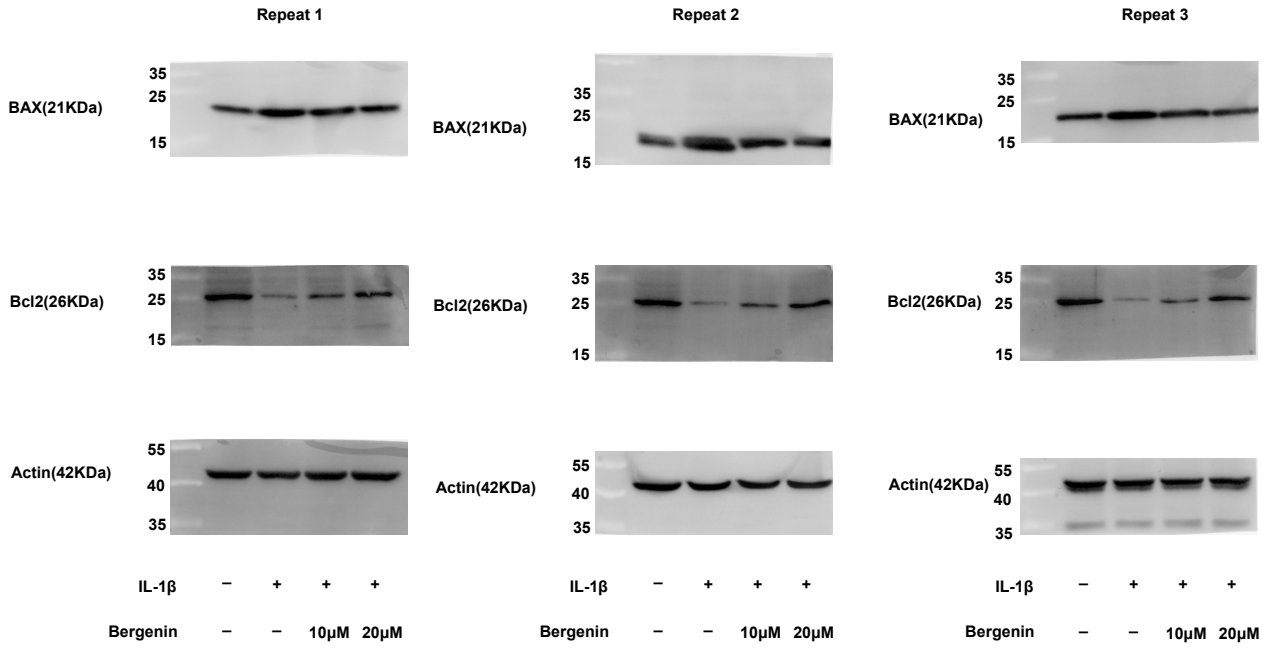

Supplement: 41598_2024_71259_MOESM2_ESM.pdf [file 41598_2024_71259_MOESM2_ESM.pdf]

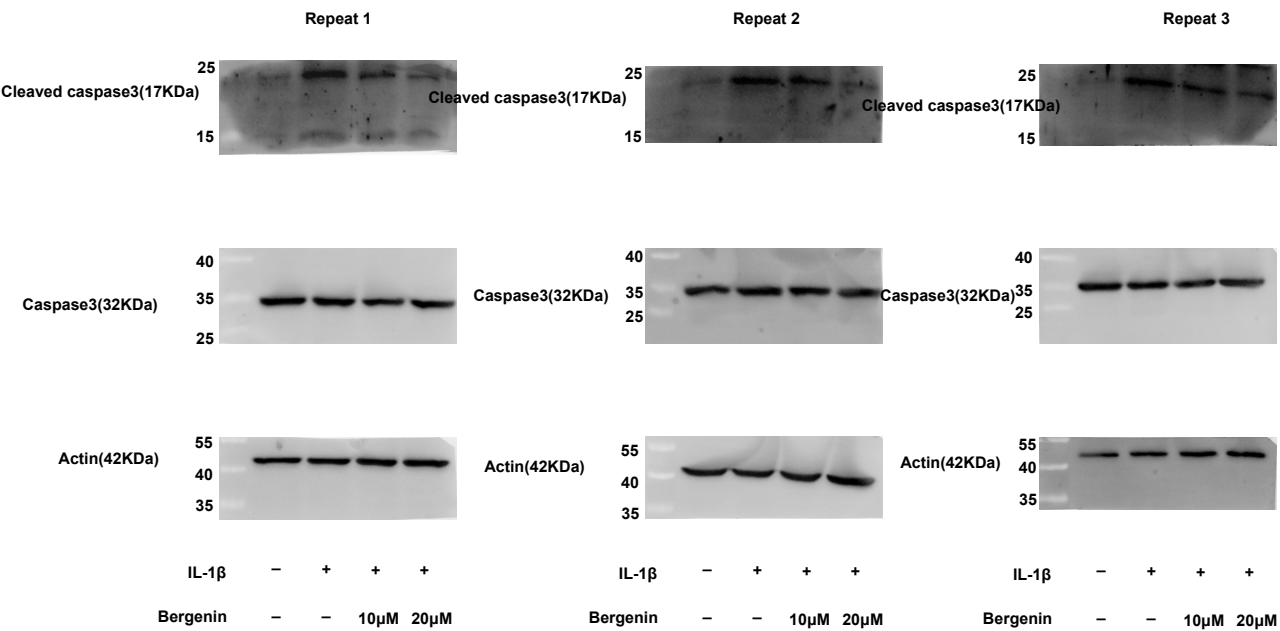

Supplement: 41598_2024_71259_MOESM3_ESM.pdf [file 41598_2024_71259_MOESM3_ESM.pdf]

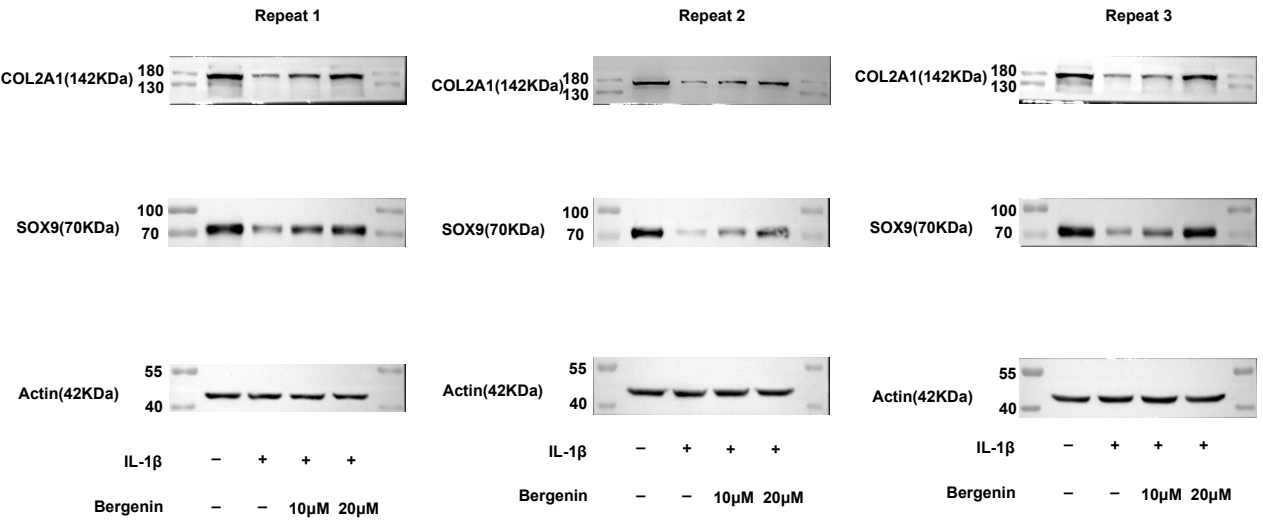

Supplement: 41598_2024_71259_MOESM5_ESM.pdf [file 41598_2024_71259_MOESM5_ESM.pdf]

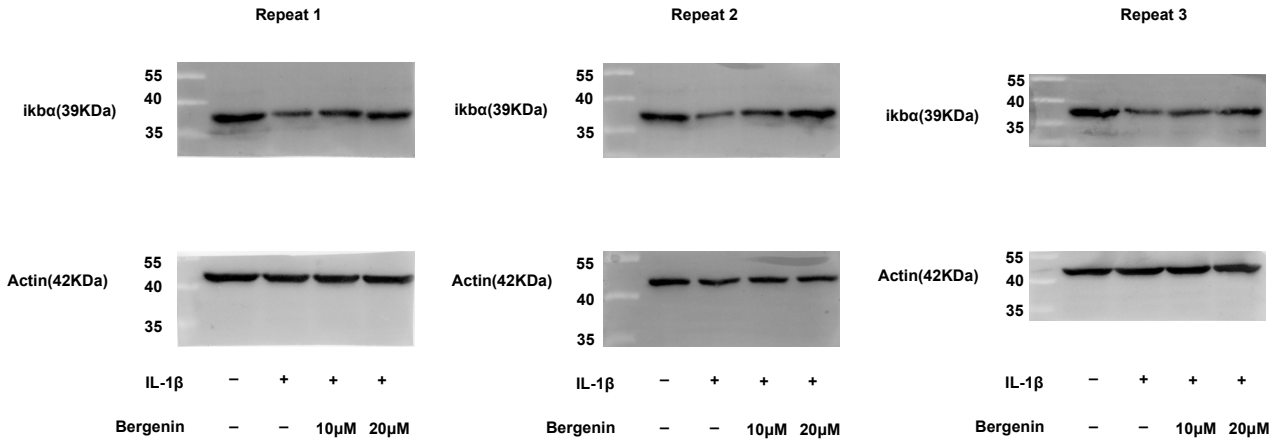

Supplement: 41598_2024_71259_MOESM7_ESM.pdf [file 41598_2024_71259_MOESM7_ESM.pdf]

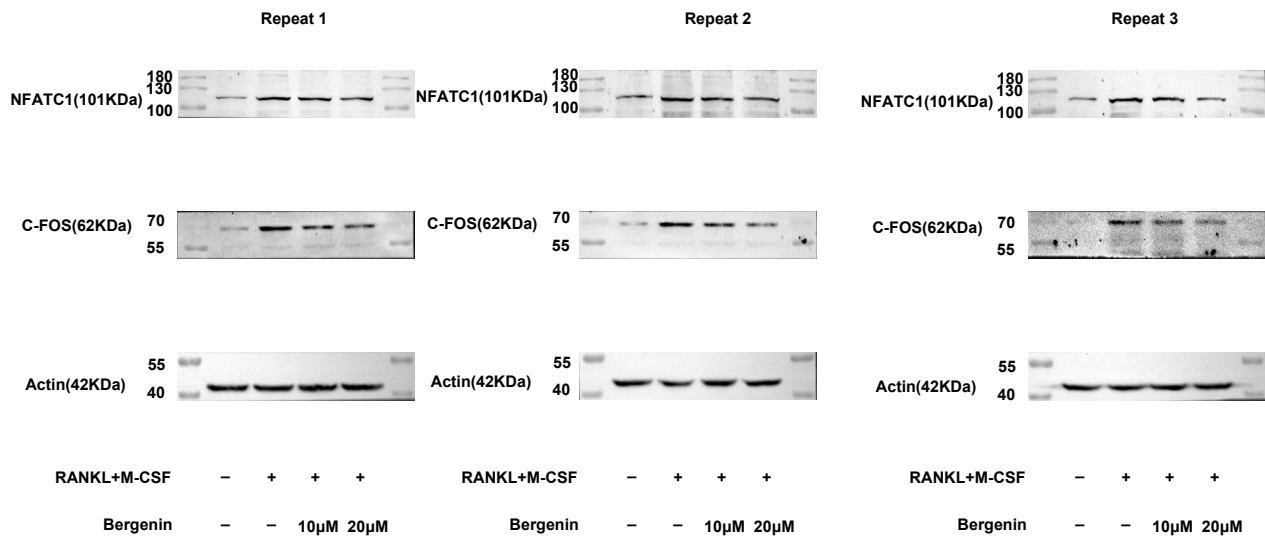

Supplement: 41598_2024_71259_MOESM8_ESM.pdf [file 41598_2024_71259_MOESM8_ESM.pdf]

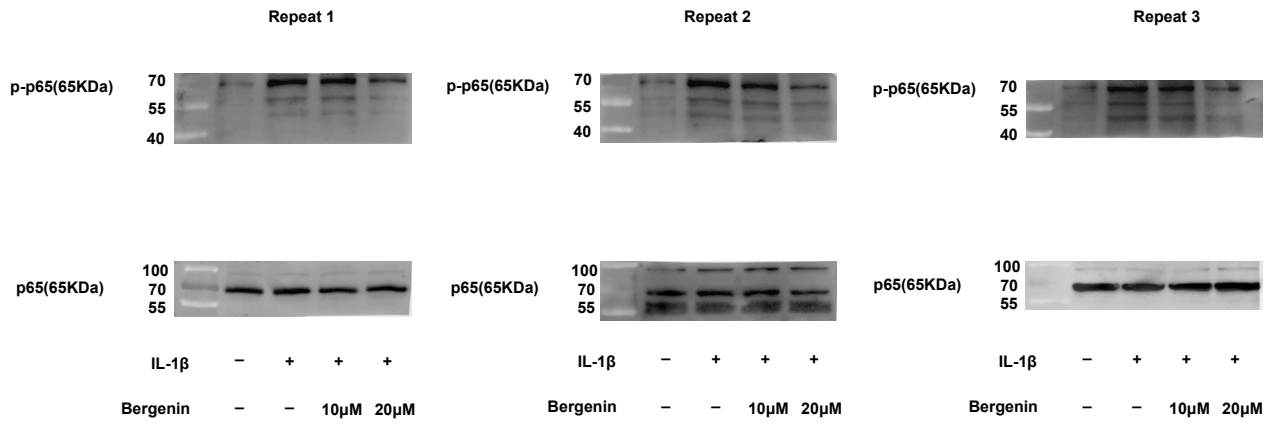

Supplement: 41598_2024_71259_MOESM9_ESM.pdf [file 41598_2024_71259_MOESM9_ESM.pdf]
